# Supplementary material for: Electronic and steric effects in fragmentation reactions of Os3(CO)9(μ-C4Ph4)
Source: Royal Society of Chemistry journal article supplement (doi:10.1039/b418940j), 2005-01-01
Supplement: b418940j.pdf [file b418940j.pdf]

**Electronic supplementary information for:**

**Electronic and steric effects in fragmentation reactions of  $\text{Os}_3(\text{CO})_9(\mu\text{-C}_4\text{Ph}_4)^\dagger$**

Kevin A. Buntent,<sup>a</sup> Consuelo Moreno<sup>b</sup> and Anthony J. Poë<sup>\*a</sup>

<sup>a</sup> Lash Miller Chemical Laboratories, University of Toronto, 80 St. George Street, Toronto, Canada, M5S 3H6. Tel: 01 416 978 3924; E-mail: apoe@chem.utoronto.ca

<sup>b</sup> Departamento de Química Inorgánica, Universidad Autónoma de Madrid, Cantoblanco, 28049-Madrid, Spain.

**Table S1.** Values of  $k_{\text{obs}}$  and  $k_2$  for the reaction of P-donor nucleophiles with  $\text{Os}_3(\text{CO})_9(\mu\text{-C}_4\text{Ph}_4)$  at various temperatures.

| $10^4[\text{L}] (\text{M}^{-1})$                                        | $10^4 k_{\text{obs}} (\text{s}^{-1})$ | $k_2$     |
|-------------------------------------------------------------------------|---------------------------------------|-----------|
| <b>P(<i>p</i>-F<sub>3</sub>CC<sub>6</sub>H<sub>4</sub>)<sub>3</sub></b> |                                       |           |
| <b>40°C</b>                                                             |                                       |           |
| 9.04                                                                    | 0.094                                 | 0.0129(7) |
| 9.04                                                                    | 0.105                                 |           |
| 23.0                                                                    | 0.159                                 |           |
| 26.5                                                                    | 0.335                                 |           |
| 35.0                                                                    | 0.326                                 |           |
| 39.7                                                                    | 0.472                                 |           |
| 45.0                                                                    | 0.427                                 |           |
| 52.9                                                                    | 0.621                                 |           |
| 56.0                                                                    | 1.03                                  |           |
| 79.4                                                                    | 1.09                                  |           |
| 95.3                                                                    | 1.37                                  |           |
| 103.4                                                                   | 1.39                                  |           |
| <b>50°</b>                                                              |                                       |           |
| 20.1                                                                    | 0.641                                 | 0.021(2)  |
| 40.2                                                                    | 0.923                                 |           |
| 60.3                                                                    | 1.45                                  |           |
| 80.4                                                                    | 1.90                                  |           |
| <b>60°</b>                                                              |                                       |           |
| 40.2                                                                    | 1.37                                  | 0.032(3)  |
| 60.3                                                                    | 1.92                                  |           |
| 80.4                                                                    | 2.75                                  |           |
| 80.4                                                                    | 2.68                                  |           |
| <b>70°</b>                                                              |                                       |           |
| 47.1                                                                    | 3.78                                  | 0.048     |

|                                                             |                          |           |
|-------------------------------------------------------------|--------------------------|-----------|
| 62.8                                                        | 4.38                     |           |
| 70.6                                                        | 4.67                     |           |
| 78.4                                                        | 5.50                     |           |
| <hr/>                                                       |                          |           |
| <b>P(<i>p</i>-ClC<sub>6</sub>H<sub>4</sub>)<sub>3</sub></b> |                          |           |
| <b>40°</b>                                                  |                          |           |
| 34.7                                                        | 1.98                     | 0.057(1)  |
| 34.7                                                        | 1.99                     |           |
| 49.8                                                        | 2.76                     |           |
| 60.4                                                        | 3.41                     |           |
| 77.8                                                        | 4.44                     |           |
| 86.4                                                        | 4.90                     |           |
| 97.4                                                        | 5.56                     |           |
| <b>50°</b>                                                  |                          |           |
| 24.8                                                        | 2.60                     | 0.103(2)  |
| 49.5                                                        | 5.10                     |           |
| 74.3                                                        | 7.73                     |           |
| 99.0                                                        | 9.98                     |           |
| <b>60°</b>                                                  |                          |           |
| 24.8                                                        | 4.60                     | 0.180(4)  |
| 49.5                                                        | 9.17                     |           |
| 74.3                                                        | 13.54                    |           |
| 99.0                                                        | 18.1                     |           |
| <hr/>                                                       |                          |           |
| <b>P(<i>p</i>-FC<sub>6</sub>H<sub>4</sub>)<sub>3</sub></b>  |                          |           |
| <b>30°</b>                                                  |                          |           |
| 72.4                                                        | Original<br>Data Missing | 0.0534(3) |
| 86.9                                                        |                          |           |
| 115.9                                                       |                          |           |
| 144.8                                                       |                          |           |
| <b>40°</b>                                                  |                          |           |
| 9.05                                                        | 0.860                    | 0.107(2)  |
| 9.54                                                        | 1.00                     |           |
| 15.9                                                        | 1.67                     |           |

|                        |      |          |
|------------------------|------|----------|
| 22.6                   | 2.36 |          |
| 33.5                   | 3.58 |          |
| 45.0                   | 4.78 |          |
| 56.6                   | 6.01 |          |
| 143.2                  | 14.4 |          |
| <b>50°</b>             |      |          |
| 34.7                   | 6.66 | 0.182(9) |
| 69.3                   | 13.2 |          |
| 104.0                  | 18.7 |          |
| 138.6                  | 24.3 |          |
| <b>60°</b>             |      |          |
| 34.7                   | 12.8 | 0.32(2)  |
| 69.3                   | 23.0 |          |
| 104.0                  | 33.6 |          |
| 138.6                  | 46.4 |          |
| <b>PPh<sub>3</sub></b> |      |          |
| <b>40°</b>             |      |          |
| 8.67                   | 3.41 | 0.393    |
| 11.5                   | 4.51 |          |
| 19.8                   | 7.80 |          |
| 10.2                   | 4.02 |          |
| 17.7                   | 6.94 |          |
| 26.2                   | 10.3 |          |
| 37.2                   | 14.6 |          |
| <b>50°</b>             |      |          |
| 17.5                   | 11.5 | 0.70(2)  |
| 26.3                   | 17.6 |          |
| 35.1                   | 23.1 |          |
| 43.8                   | 30.1 |          |
| <b>60°</b>             |      |          |
| 13.0                   | 14.5 | 1.25(3)  |
| 17.5                   | 21.2 |          |
| 21.7                   | 25.2 |          |

|                                     |       |         |
|-------------------------------------|-------|---------|
| 26.3                                | 32.0  |         |
| 32.6                                | 38.8  |         |
| 32.6                                | 38.7  |         |
| 43.5                                | 52.5  |         |
| 43.5                                | 53.0  |         |
| 43.8                                | 62.9  |         |
| <hr/>                               |       |         |
| <b>P(<i>i</i>-Pr)Ph<sub>2</sub></b> |       |         |
| <b>40°</b>                          |       |         |
| 18.2                                | 19.4  | 0.93(2) |
| 22.7                                | 24.7  |         |
| 36.4                                | 37.1  |         |
| 46.8                                | 46.8  |         |
| 54.6                                | 55.4  |         |
| 72.7                                | 68.9  |         |
| 73.9                                | 70.7  |         |
| 90.9                                | 87.5  |         |
| 90.9                                | 83.3  |         |
| 110.9                               | 90.3  |         |
| 121.5                               | 94.4  |         |
| 130.8                               | 107.4 |         |
| 151.9                               | 109.5 |         |
| 169.0                               | 124.9 |         |
| <b>50°</b>                          |       |         |
| 18.1                                | 30.3  | 1.6(2)  |
| 36.4                                | 63.3  |         |
| 54.6                                | 93.6  |         |
| 72.7                                | 122.1 |         |
| <b>60°</b>                          |       |         |
| 13.4                                | 28.2  | 2.4(3)  |
| 20.1                                | 45.1  |         |
| 33.5                                | 76.2  |         |
| 46.8                                | 107.0 |         |
| 60.2                                | 133.6 |         |
| <hr/>                               |       |         |
| <b>PCyPh<sub>2</sub></b>            |       |         |

|                                       |       |         |
|---------------------------------------|-------|---------|
| <b>40°</b>                            |       |         |
| 12.7                                  | 11.9  | 0.90(4) |
| 19.1                                  | 18.9  |         |
| 25.4                                  | 24.1  |         |
| 25.4                                  | 25.4  |         |
| 31.8                                  | 30.6  |         |
| 38.1                                  | 40.2  |         |
| 50.8                                  | 46.2  |         |
| 63.5                                  | 51.8  |         |
| 63.5                                  | 55.3  |         |
| 63.5                                  | 54.8  |         |
| <b>50°</b>                            |       |         |
| 11.2                                  | 20.2  | 1.65(8) |
| 22.4                                  | 40.5  |         |
| 33.5                                  | 59.0  |         |
| 44.7                                  | 74.8  |         |
| 44.7                                  | 75.9  |         |
| <b>60°</b>                            |       |         |
| 22.4                                  | 61.9  | 2.9(1)  |
| 33.5                                  | 95.0  |         |
| 33.5                                  | 94.5  |         |
| 44.7                                  | 125.9 |         |
| <b>P(NMe<sub>2</sub>)<sub>3</sub></b> |       |         |
| <b>40°</b>                            |       |         |
| 13.8                                  | 51.7  | 4.3     |
| 19.3                                  | 73.4  |         |
| 24.8                                  | 91.2  |         |
| 27.5                                  | 109.0 |         |
| 27.5                                  | 126.3 |         |
| 38.5                                  | 164.0 |         |
| 57.8                                  | 251.8 |         |
| <b>50°</b>                            |       |         |
| 13.8                                  | 72.8  | 5.7(3)  |
| 27.5                                  | 152   |         |

|                          |       |         |
|--------------------------|-------|---------|
| 41.3                     | 233   |         |
| 55.0                     | 324   |         |
| 68.8                     | 403   |         |
| <b>60°</b>               |       |         |
| 13.8                     | 87.5  | 7.3(4)  |
| 20.6                     | 132   |         |
| 27.5                     | 182   |         |
| 34.4                     | 246   |         |
| 34.4                     | 242   |         |
| <b>PCy<sub>2</sub>Ph</b> |       |         |
| <b>50°</b>               |       |         |
| 10.8                     | 5.48  | 0.33(3) |
| 13.0                     | 6.31  |         |
| 17.3                     | 7.52  |         |
| 21.6                     | 8.76  |         |
| 13.0                     | 6.55  |         |
| 10.8                     | 5.35  |         |
| 21.6                     | 8.93  |         |
| 17.3                     | 7.93  |         |
| <b>60°</b>               |       |         |
| 9.0                      | 3.88  | 0.47(4) |
| 13.5                     | 6.51  |         |
| 19.4                     | 9.52  |         |
| 22.5                     | 10.75 |         |
| <b>70°</b>               |       |         |
| 10.8                     | 4.91  | 0.64(8) |
| 13.0                     | 6.29  |         |
| 17.3                     | 8.31  |         |
| 21.6                     | 12.84 |         |
| 21.6                     | 12.67 |         |
| <b>PCy<sub>3</sub></b>   |       |         |
| <b>50°</b>               |       |         |
| 35.6                     | 73.7  | 1.4(2)  |

|                                                                |      |         |
|----------------------------------------------------------------|------|---------|
| 66.7                                                           | 117  |         |
| 71.1                                                           | 188  |         |
| 106.7                                                          | 258  |         |
| 133.4                                                          | 177  |         |
| 178                                                            | 392  |         |
| <b>60°</b>                                                     |      |         |
| 17.8                                                           | 29.4 | 2.2(3)  |
| 35.6                                                           | 73.8 |         |
| 71.1                                                           | 188  |         |
| 107                                                            | 258  |         |
| 142                                                            | 328  |         |
| 178                                                            | 392  |         |
| <b>70°</b>                                                     |      |         |
| 16.9                                                           | 38.7 | 3.3(1)  |
| 16.9                                                           | 44.3 |         |
| 50.7                                                           | 167  |         |
| 84.5                                                           | 261  |         |
| 118                                                            | 373  |         |
| 169                                                            | 529  |         |
| <b>P(<i>o</i>-MeOC<sub>6</sub>H<sub>4</sub>)Ph<sub>2</sub></b> |      |         |
| <b>40°</b>                                                     |      |         |
| 10.4                                                           | 3.08 | 0.26(1) |
| 17.4                                                           | 4.99 |         |
| 20.8                                                           | 6.06 |         |
| 24.3                                                           | 6.68 |         |
| 27.8                                                           | 7.38 |         |
| 34.7                                                           | 9.32 |         |
| <b>50°</b>                                                     |      |         |
| 14.0                                                           | 7.11 | 0.49(1) |
| 20.9                                                           | 10.8 |         |
| 27.9                                                           | 13.8 |         |
| 34.9                                                           | 17.5 |         |
| <b>60°</b>                                                     |      |         |

|                                   |       |           |
|-----------------------------------|-------|-----------|
| 14.0                              | 12.6  | 0.884(1)  |
| 20.9                              | 18.8  |           |
| 27.9                              | 25.0  |           |
| 34.9                              | 31.1  |           |
| <b>P(<i>t</i>-Bu)<sub>3</sub></b> |       |           |
| <b>70°</b>                        |       |           |
| 210                               | 1.32  | 0.0021(9) |
| 388                               | 0.851 |           |
| 669                               | 1.12  |           |
| 863                               | 3.01  |           |
| 1035                              | 3.56  |           |
| 1697                              | 5.23  |           |
| <b>80°</b>                        |       |           |
| 145                               | 0.238 | 0.0050(3) |
| 296                               | 1.11  |           |
| 407                               | 1.82  |           |
| 501                               | 1.52  |           |
| 669                               | 2.14  |           |
| 929                               | 3.19  |           |
| 948                               | 3.98  |           |
| 1697                              | 7.16  |           |
| <b>90°</b>                        |       |           |
| 145                               | 0.270 | 0.884(1)  |
| 443                               | 3.72  |           |
| 532                               | 4.77  |           |
| 863                               | 9.81  |           |
| 1022                              | 10.1  |           |
| 2002                              | 17.1  |           |



**Table S2.** Kinetic data<sup>a</sup> and physical parameters for the reaction of P-donor nucleophiles with Os<sub>3</sub>(CO)<sub>9</sub>(μ-C<sub>4</sub>Ph<sub>4</sub>) at 13.6°C, where  $\theta \leq 143^\circ$ .

| <b>L</b>                            | <b>log(k<sub>+L</sub>)</b> | <b>log(k<sub>-CO</sub>)</b> | <b>pK<sub>a</sub>'+4</b> | <b>θ(deg)</b> | <b>E<sub>ar</sub></b> | <b>pK<sub>a</sub>'π</b> |
|-------------------------------------|----------------------------|-----------------------------|--------------------------|---------------|-----------------------|-------------------------|
| <b>etpb</b>                         | 1.358                      | -0.752                      | 3.70                     | 101           | 0                     | 8.50                    |
| <b>P(OMe)<sub>3</sub></b>           | 1.301                      | -0.694                      | 4.83                     | 107           | 0                     | 2.80                    |
| <b>P(OEt)<sub>3</sub></b>           | 1.509                      | -1.147                      | 5.64                     | 109           | 0                     | 2.90                    |
| <b>P(OMe)<sub>2</sub>Ph</b>         | 1.336                      | -1.292                      | 5.48                     | 120           | 1                     | 2.37                    |
| <b>P(OEt)<sub>2</sub>Ph</b>         | 1.403                      | -1.409                      | 5.99                     | 121           | 1                     | 1.97                    |
| <b>PMe<sub>2</sub>Ph</b>            | 2.149                      | -1.415                      | 9.07                     | 122           | 1                     | 0                       |
| <b>PPh<sub>2</sub>H</b>             | 1.524                      | -                           | 4.52                     | 126           | 2                     | 0                       |
| <b>P(OPh)<sub>3</sub></b>           | 0.421                      | -1.456                      | 1.21                     | 128           | 0                     | 5.33                    |
| <b>P(O-<i>i</i>-Pr)<sub>3</sub></b> | 1.509                      | -1.504                      | 7.38                     | 130           | 0                     | 4.00                    |
| <b>PEt<sub>3</sub></b>              | 1.966                      | -2.046                      | 11.96                    | 132           | 0                     | 0.00                    |
| <b>P(<i>n</i>-Pr)<sub>3</sub></b>   | 1.603                      | -2.377                      | 12.57                    | 132           | 0                     | 0.00                    |
| <b>P(<i>n</i>-Bu)<sub>3</sub></b>   | 1.656                      | -1.757                      | 12.67                    | 132           | 0                     | 0.00                    |
| <b>P(OMe)Ph<sub>2</sub></b>         | 1.061                      | -0.943                      | 6.09                     | 133           | 2                     | 0.86                    |
| <b>P(OEt)Ph<sub>2</sub></b>         | 1.009                      | -2.055                      | 6.35                     | 133           | 2                     | 0.65                    |
| <b>PMePh<sub>2</sub></b>            | 1.695                      | -2.260                      | 8.06                     | 136           | 2                     | 0.00                    |
| <b>PEtPh<sub>2</sub></b>            | 1.338                      | -1.620                      | 8.60                     | 140           | 2                     | 0.00                    |
| <b>PCy<sub>2</sub>H</b>             | 1.199                      | -1.824                      | 10.08                    | 143           | 0                     | 0.00                    |

a From ref. 14.

**Table S3.** Recalculated QALE analysis of the values of  $\log(k_{+L})$  and  $\log(k_{-CO})$  for the reaction of small P-donor nucleophiles ( $\theta \leq 143^\circ$ ) with  $\text{Os}_3(\text{CO})_9(\mu\text{-C}_4\text{Ph}_4)$  at  $13.6^\circ\text{C}$ .<sup>a</sup>

| $N^b$  | $\alpha$   | $\beta$   | $\gamma/\text{deg}$ | $\theta_{\text{th}}$<br>/deg | $\sigma\log(k_{+L})$  | $R^2$ |
|--------|------------|-----------|---------------------|------------------------------|-----------------------|-------|
| $6^c$  | 0.564(217) | 0.163(36) | –                   | –                            | 0.145                 | 0.837 |
| $7^d$  | 5.42(118)  | 0.163     | -0.040(9)           | 122                          | 0.116                 | 0.809 |
| $13^e$ | 3.281(503) | 0.164(20) | -0.024(4)           | –                            | 0.167                 | 0.868 |
| $13^e$ | 0.557(93)  | 0.163(15) | -0.044(6)           | 122                          | 0.125                 | 0.928 |
| $N^b$  | $\alpha$   | $\beta$   | $\gamma$            | $\theta_{\text{th}}$         | $\sigma\log(k_{-CO})$ | $R^2$ |
| $16^f$ | -0.77(25)  | -0.10(3)  |                     |                              | 0.394                 | 0.434 |
| $16^f$ | 1.74(95)   | -0.06(3)  | -0.023(8)           |                              | 0.327                 | 0.636 |

a) Rate data from ref 14. b) Number of P-donors used in calculation. c) Analysis of the data for nucleophiles with  $\theta \leq 122^\circ$  that experience no steric effects. d) Calculated from data for nucleophiles with cone angles  $\theta \geq 123^\circ$  that do experience steric effects and using  $\beta = 0.163$  as found for the smaller group of nucleophiles. e) Omitting ‘outlying’ P-donors as in ref 14, and assuming no steric threshold. f) All P-donors from ref. 14, and allowing for a steric threshold. This analysis seems to be the best available, but only marginally so.

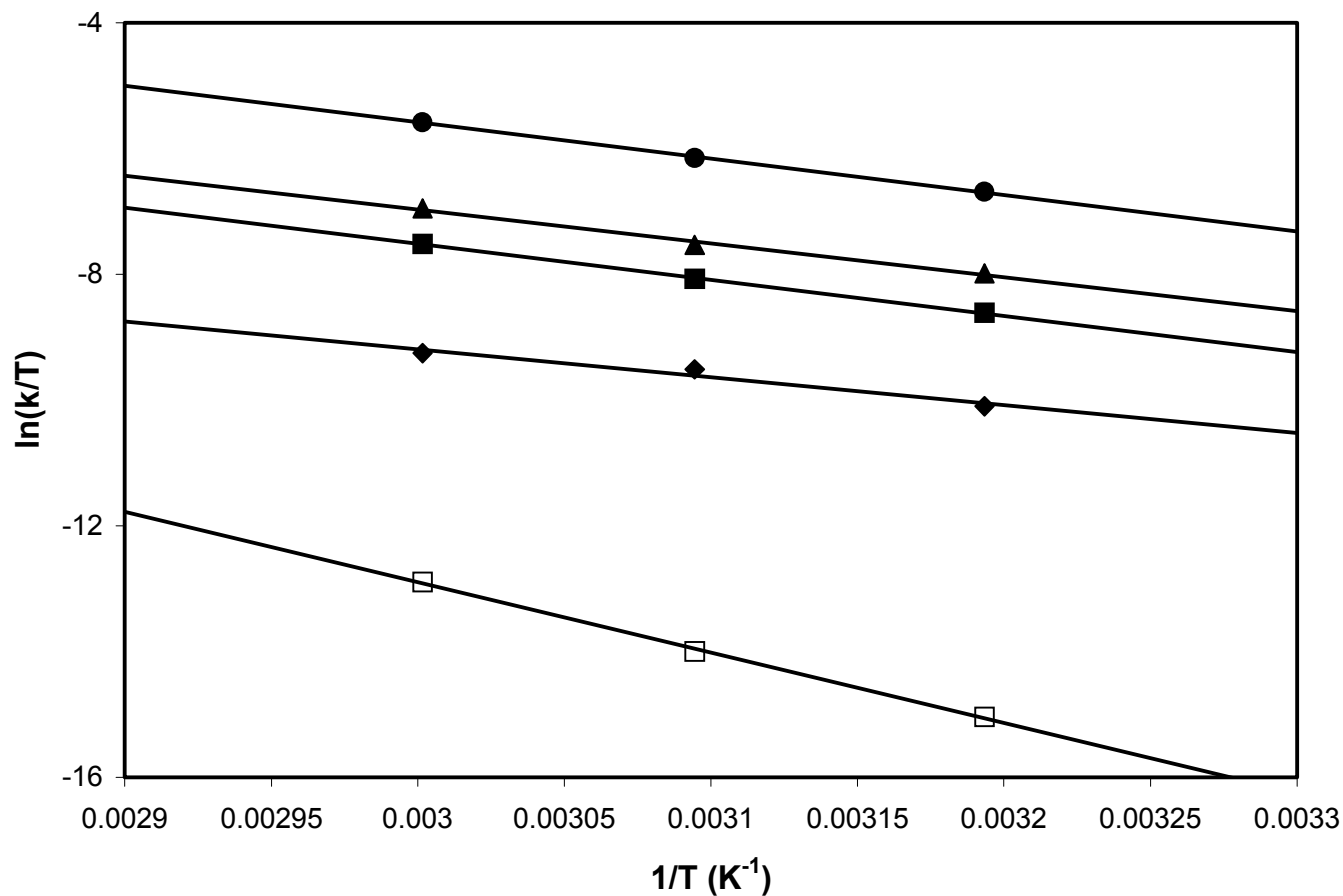

**Figure S1.** Eyring plots for representative reactions of P-donor nucleophiles with  $\text{Os}_3(\text{CO})_9(\mu\text{-C}_4\text{Ph}_4)$  where  $\theta \geq 143^\circ$ .  $\text{PPh}_3$  (solid circles),  $\text{P}(p\text{-FC}_6\text{H}_4)_3$  (solid triangles),  $\text{P}(p\text{-ClC}_6\text{H}_4)_3$  (solid squares),  $\text{P}(p\text{-F}_3\text{CC}_6\text{H}_4)_3$  (solid diamonds),  $\text{P}(t\text{-Bu})_3$  (open squares).

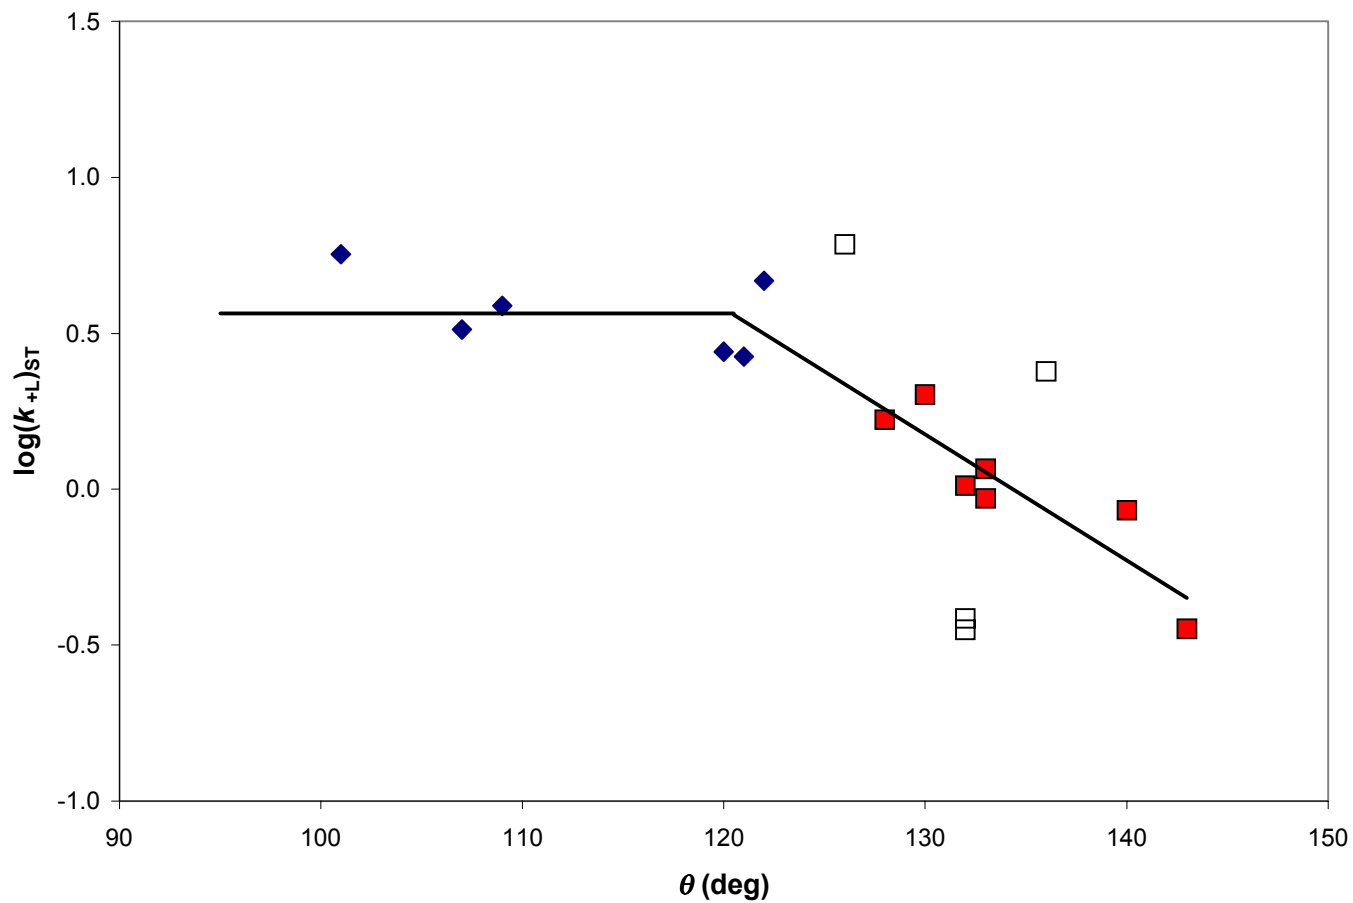

**Figure S2.** Steric profile for the reaction of smaller P-donor nucleophiles (SNs) with  $\text{Os}_3(\text{CO})_9(\mu\text{-C}_4\text{Ph}_4)$  at  $13.6^\circ\text{C}$ , where  $\theta \leq 143^\circ$  and  $\theta_{\text{th}} = 122^\circ$ . Outliers are the same as in ref. 14.

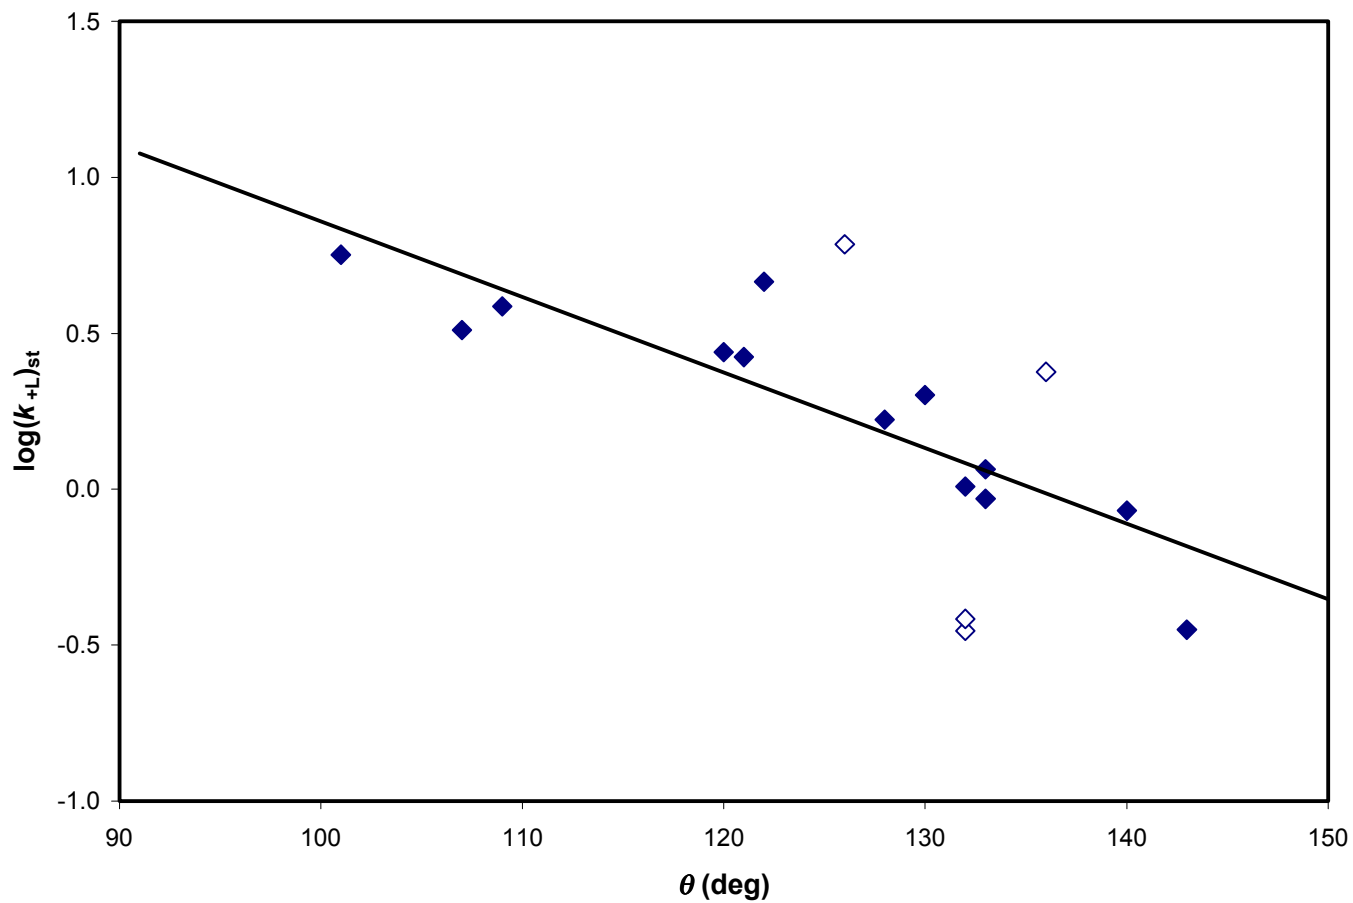

**Figure S3.** Steric profile for the reaction of smaller P-donor nucleophiles with  $\text{Os}_3(\text{CO})_9(\mu\text{-C}_4\text{Ph}_4)$  at  $13.6^\circ\text{C}$ , where  $\theta \leq 143^\circ$  and no steric threshold is thought to be operating. Outliers are the same as in ref. 14.
